# Supplementary material for: Asymmetry of Sagittal Otolith Shape Based on Inner Ear Side Tested on Mediterranean Red Mullet (Mullus barbatus Linnaeus, 1758): Comparative Analysis of 2D and 3D Otolith Shape Data
Source: MDPI journal article supplement (doi:10.3390/sym15051067), 2023-05-11
Supplement: s1 [file s1]

## Supplementary

**Table S1.** Scan parameters on the  $\mu$ CT Skyscan 1174 (Bruker).

| Parameters        | Measures      |
|-------------------|---------------|
| Type of scanning  | Oversize scan |
| Rotation step     | 0.7°          |
| Number of catches | 2             |
| Intensity         | 800 $\mu$ A   |
| Tension           | 50Kv          |
| Exposure          | 3,000ms       |
| Filter            | 0.5mm AL      |
| Voxel size        | 29.2 $\mu$ m  |
